# Supplementary figures and images for: Biyang floral mushroom-derived exosome-like nanovesicles: characterization, absorption stability and ionizing radiation protection
Source: Royal Society of Chemistry journal article supplement (doi:10.1039/d4fo00263f), 2024-01-01

Electrophoretic results of Figure 1D-E

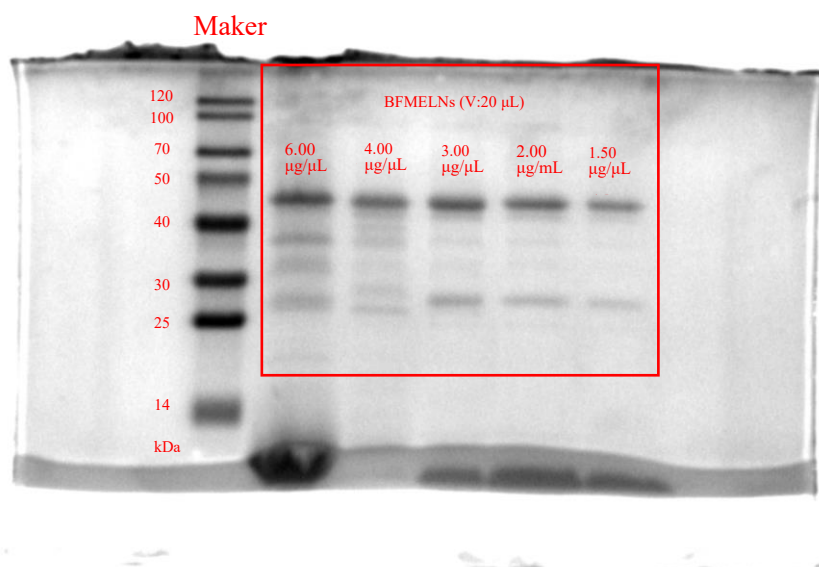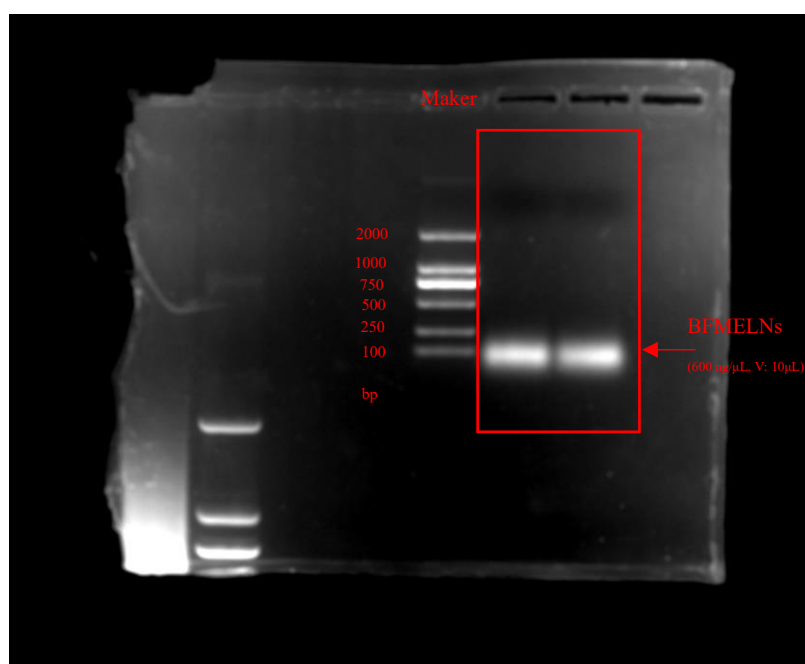

Supplement: d4fo00263f1.pdf [file d4fo00263f1.pdf]
